# Supplementary material
Source: publisher site journal article supplement (https://www.dovepress.com/article/240305)
Supplement: Supplementary file 1 [file get_supplementary_file.php]

## Supporting Information

# Design and Characterization of Chitosan-Graphene Oxide Nanocomposites for the Delivery of Proanthocyanidins

Toribio Figueroa<sup>a</sup>, Claudio Aguayo<sup>b</sup>, Katherina Fernández<sup>a</sup>

<sup>a</sup>Laboratory of Biomaterials, Department of Chemical Engineering, Faculty of Engineering, University of Concepción, Concepción, Chile.

<sup>b</sup>Department of Clinical Biochemistry and Immunology, Faculty of Pharmacy, University of Concepción, Concepción, Chile.

**CONTACT:** Katherina Fernández, E-mail: [kfernandeze@udec.cl](mailto:kfernandeze@udec.cl), <sup>a</sup>Laboratory of Biomaterials, Department of Chemical Engineering, Faculty of Engineering, University of Concepción, Concepción, Chile.

**Phloroglucinolysis:** A solution of 0.1 moleq./HCl in methanol containing 50 g L<sup>-1</sup> of phloroglucinol was reacted with the seed and skin extracts (5 g L<sup>-1</sup>) at 50°C for 20 min. Then, the mixture was combined with 5 volumes of aqueous sodium acetate 40 mM, to stop the reaction. The procedure was performed in duplicate for all tested samples. The compounds were detected with an HPLC Merck-Hitachi chromatograph LaChrom L7000 Series, with a gradient pump L-7100, Autosampler L-7200, UV detector L-4250 (wavelength 280 nm) and two Chromolith Performance Series RP-18e columns (Merck, Darmstadt, Germany). The mobile phase consisted of Milli-Q water with 1% v/v aqueous acetic acid (mobile phase A) and acetonitrile with 1% v/v acetic acid (mobile phase B) and elution was performed with 3% B for 4 min. The linear gradients used were 3–18% B for 14 min and 80% B for 2 min at a flow rate of 3 mL min<sup>-1</sup> and 30°C. The column was washed with 3% B for 2 min before the next injection was performed. To quantify the samples, an external standard of catechin (100 mg of C L<sup>-1</sup>) was used. The extract characterization gave values of mean degree of polymerization (mDP), average molecular weight (aMW), the proportion of their components ((+)-catechin (C), (-)-epicatechin (EC), (-)-epigallocatechin (EGC), (-)-epicatechingallate (ECG), (-)-epicatechin-phloroglucinol (EC-P), (d)-epicatechingallatephloroglucinol (ECG-P), (d)epigallocatechin-phloroglucinol (EGC-P)), yield (>80 g/100 g), and concentration.

**Table S1:** Structure composition, mean degree of polymerization (mDP), average molecular weight (aMW) and concentration of the grape extract.

| Compound <sup>a</sup>   | Extract     |
|-------------------------|-------------|
| C                       | 166 ± 13    |
| EC                      | 88 ± 3      |
| ECG                     | 445 ± 18    |
| C-P                     | 459 ± 18    |
| EC-P                    | 2937 ± 46   |
| ECG-P                   | 1604 ± 19   |
| EGC-P                   | nd          |
| mDP <sup>b</sup>        | 9.2 ± 0.3   |
| aMW <sup>c</sup>        | 3019 ± 87   |
| PA content <sup>d</sup> | 329.5 ± 6.7 |

nd: not detected. (C) (+)-catechin. (EC) (-)-epicatechin. (EGC) epigallocatechin. (C-P) (+)-catechin-phloroglucinol. (EC-P) (-)-epicatechin-phloroglucinol. (ECG-P) epicatechin gallate-phloroglucinol. (EGC-P) epigallocatechin-phloroglucinol. Values are mean±standard deviation (n=2)

<sup>a</sup> Flavan-3-ol subunit expressed as micromolar (μM) of (+)-catechin equivalents.

<sup>b</sup>Mean degree of polymerization dimensionless.

<sup>c</sup>Average molecular weight of PA.

<sup>d</sup>Total Proanthocyanidin concentration in the extract (mg CE/g extract).

**Gel permeation chromatography (GPC).** Samples (50 mg) were acetylated with pyridine and acetic anhydride (2 mL, 1:1, v/v) overnight at room temperature. The solvents were evaporated and the acetylated extracts were dissolved in tetrahydrofuran THF (10–15 mg mL<sup>-1</sup>), and the molecular weight distribution of the extracts was determined with the HPLC (ACME 9000, Young Lin Instrument Co. Ltd., Anyang, Korea) which was equipped with a UV/VIS detector and two PSS SDV gel columns (5 µm, 100 and 500 Å) of 30 cm and a PSS SDV gel precolumn (5 µm) equilibrated at 23°C. Analytes were detected at 254 nm at a flow rate of 1 mL/min of the mobile phase (THF) and with an injection volume of 20 µL. Ten standards of polystyrenes with different molecular weights were used, Mw 162–19,950 Da.

**Table S2:** Molecular weight distribution of grape seed extract

| Molecules<br>percentage (%) | Molecular weight<br>range (g/mol) |
|-----------------------------|-----------------------------------|
| 15.9                        | 21928-13944                       |
| 25.1                        | 13944-9263                        |
| 58.9                        | 9263-800                          |

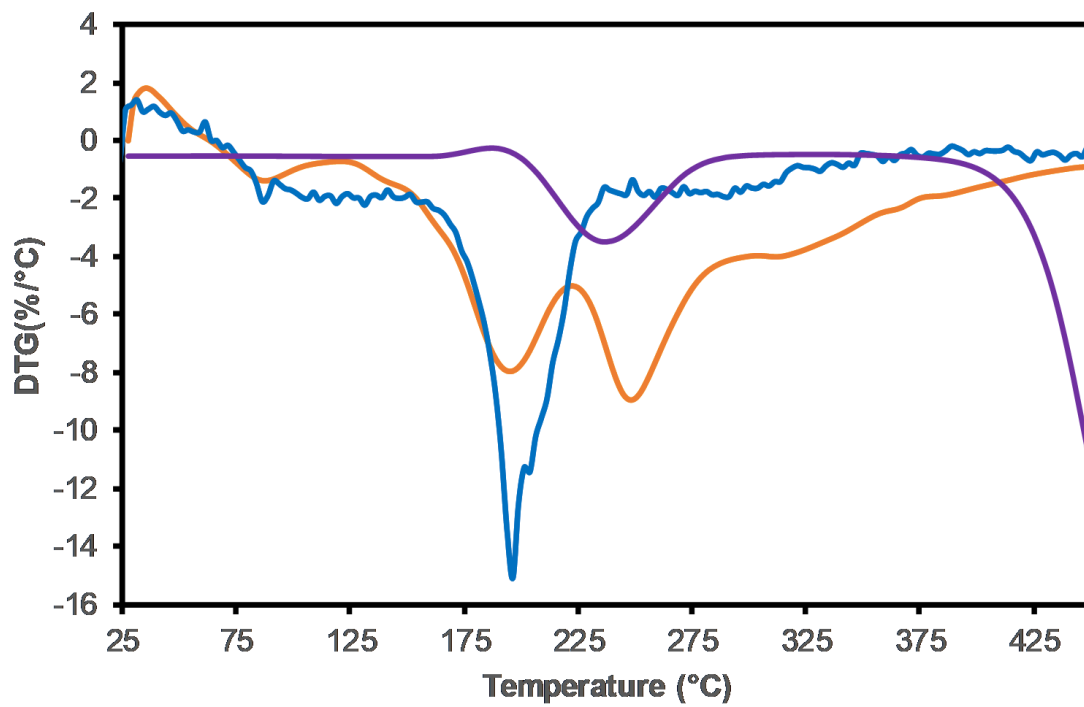

**Figure 1S.** DTG curves of GO (blue), CS (purple) and GO-CS (orange).
